# Supplementary material for: Characteristics of Atmospheric Metalliferous Particles during Large-Scale Fireworks in Korea
Source: Hindawi journal article supplement (doi:10.1155/2015/423275), 2015-01-01
Supplement: f1 [file 423275.f1.doc]

**SUPPLEMENTARY MATERIAL**

**Characteristics of atmospheric metalliferous particles during large-scale fireworks in Korea**

Zang-Ho Shon1,*, Ju-hee Jeong2, and Yoo-Keun Kim2

*1Department of Environmental Engineering, Dong-Eui University, Busan, Republic of Korea*

*2Department of Atmospheric Sciences, Pusan National University, Busan, Republic of Korea*

**Content**

**Supplementary Table 1**. Summary of firework types and amount used at each BFF during the study period.

**Supplementary Table 2**. Details of the grids and physical options used in the WRF model.

**Supplementary Table 1**. Summary of firework types and amount used at each BFF during the study period.

| Firework | | 2012 | 2013 | Charge quantity (kg/shot) | Burst height (m) | Burst size (m) |
| --- | --- | --- | --- | --- | --- | --- |
| No. | No. |
| 3 shell | | 1,207 | 1,840 | 0.03 | 80 | 50 |
| 4 shell | | 1,224 | 2,200 | 0.1 | 110 | 60 |
| 5 shell | | 3,194 | 2,600 | 0.2 | 150 | 80 |
| 6 shell | | 2,004 | 2,900 | 0.4 | 180 | 120 |
| 7 shell | |  | 120 | 0.6 | 200 | 130 |
| 8 shell | | 223 | 180 | 0.7 | 220 | 140 |
| 10 shell | | 224 | 250 | 1.13 | 240 | 160 |
| 12 shell | | 144 | 200 | 1.9 | 270 | 200 |
| 16 shell | | 24 | 25 | 2.4 | 320 | 300 |
| 25 shell | | 1 | 1 | 3 | 500 | 400 |
| Mine | | 3,570 | 3,900 | 0.1 | 30 |  |
| Comet | | 2,625 | 3,200 | 0.1 | 50~60 |  |
| Fountain | | 1,386 | 800 | 0.02 | 3 |  |
| Frame | | 302 | 500 | 0.1 | 2 |  |
| Strobe | | 187 | 100 | 0.07 | - |  |
| Roman Candle | | 166 | 200 | 0.15 | 40 |  |
| Cakes | | 341 | 400 | 1.25 | 40 |  |
| Row | | 47 | 2060 | 0.13 | 30 |  |
| Niagara Fall | | 1,200 | 4,000 | 0 | 30 |  |
| Lance | | 4 | - | - | - |  |
| Igniter | | 8,000 | 10,000 | 0.01 | - |  |
| Delay chain | | 404 | 700 | 0.04 | - |  |
| Total |  | 26,477 | 36,176 | 80 |  |  |

**Supplementary Table 2**. Details of the grids and physical options used in the WRF model.

| Domains | D01 | D02 | D03 | D04 | D05 |
| --- | --- | --- | --- | --- | --- |
| Cells in x-direction | 78 | 136 | 127 | 97 | 121 |
| Cells in y-direction | 70 | 109 | 115 | 94 | 121 |
| Vertical layers | 43 | 43 | 43 | 43 | 43 |
| Horizontal resolution | 40.5 km | 13.5 km | 4.5 km | 1.5 km | 0.5 km |
| Radiation (short/long wave) | RRTMG/RRTMG scheme | | | | |
| Subgrid-scale cloud | Kain and Fritsch scheme for D01 and D02 | | | | |
| Grid-scale cloud | WSM3 for D01-02 and WDM3 for D03-05 | | | | |
| Surface processes | Noah Land Surface Model (LSM) | | | | |
| Boundary layer | YSU scheme | | | | |
